# Supplementary material for: Association of Cannabis Use–Related Predictor Variables and Self-Reported Psychotic Disorders: U.S. Adults, 2001–2002 and 2012–2013
Source: Atypon-hosted journal article supplement (doi:10.1176/appi.ajp.2021.21010073), 2021-10-14
Supplement: appi.ajp.2021.21010073.ds001.pdf [file appi.ajp.2021.21010073.ds001.pdf]

**TABLE S1. Sensitivity analysis: Prevalence of self-reported psychotic disorders by survey and past-year cannabis-related variables, adjusted for state medical cannabis law status**

| Past year nonmedical cannabis use groups            | NESARC, 2001-2002 |                                  |                                      |                 | N of total sample | NESARC-III, 2012-2013 |                                      |                 |
|-----------------------------------------------------|-------------------|----------------------------------|--------------------------------------|-----------------|-------------------|-----------------------|--------------------------------------|-----------------|
|                                                     | N of total sample | Self-reported psychotic disorder |                                      |                 |                   | N                     | Self-reported psychotic disorder     |                 |
|                                                     |                   | N                                | Standardized Prevalence <sup>a</sup> | SE <sup>a</sup> |                   |                       | Standardized Prevalence <sup>a</sup> | SE <sup>a</sup> |
| Without any cannabis use                            | 41,490            | 151                              | 0.27                                 | 0.03            | 32,608            | 271                   | 0.68                                 | 0.06            |
| With any cannabis use                               | 1,603             | 27                               | 1.68                                 | 0.49            | 3,701             | 66                    | 1.92                                 | 0.35            |
| With frequent cannabis use                          | 465               | 6                                | 1.05                                 | 0.48            | 1,527             | 39                    | 2.86                                 | 0.66            |
| With daily/near-daily cannabis use                  | 348               | 5                                | 0.93                                 | 0.45            | 1,161             | 28                    | 2.58                                 | 0.70            |
| With cannabis use disorder                          | 560               | 11                               | 2.60                                 | 1.10            | 1,086             | 29                    | 3.42                                 | 0.87            |
| With proxy DSM-5 cannabis use disorder <sup>b</sup> | 565               | 12                               | 2.86                                 | 1.13            | 1,104             | 29                    | 3.38                                 | 0.86            |

Note: nonmedical cannabis use: without a prescription or other than prescribed, e.g., to get high.

<sup>a</sup> Standardized prevalence are model-predicted prevalence of self-reported psychotic disorders, adjusted for sociodemographic covariates (age, gender, race/ethnicity, education level, and urbanicity) and medical cannabis law status, from logistic regression.

<sup>b</sup> Includes six DSM-IV cannabis use disorder criteria plus proxy for cannabis withdrawal syndrome (three or more of five symptoms: nervousness/anxiety; sleep disturbances; restlessness; depressed mood; and any physical symptoms: sweating/fast heartbeat; fever; shaking; nausea, vomiting, stomach pain; or headache), or using cannabis to avoid withdrawal symptoms.

**TABLE S2. Sensitivity analysis: Within-survey associations of past-year cannabis-related indicators with self-reported psychotic disorders, adjusted for state medical cannabis law status**

| Cannabis Indicator                                   | NESARC, 2001–2002                  |                     |                         |                     | NESARC-III, 2012-2013              |                     |                         |                     |
|------------------------------------------------------|------------------------------------|---------------------|-------------------------|---------------------|------------------------------------|---------------------|-------------------------|---------------------|
|                                                      | Prevalence Difference <sup>a</sup> | 95% CI <sup>a</sup> | Odds Ratio <sup>b</sup> | 95% CI <sup>b</sup> | Prevalence Difference <sup>a</sup> | 95% CI <sup>a</sup> | Odds Ratio <sup>b</sup> | 95% CI <sup>b</sup> |
| <b>Any cannabis use</b>                              | 1.41                               | 0.46, 2.35          | 6.24                    | 3.45, 11.29         | 1.24                               | 0.56, 1.92          | 2.87                    | 1.94, 4.24          |
| <b>Frequent cannabis use</b>                         | 0.78                               | -0.14, 1.70         | 3.88                    | 1.66, 9.07          | 2.18                               | 0.91, 3.45          | 4.35                    | 2.67, 7.06          |
| <b>Daily/near-daily cannabis use</b>                 | 0.66                               | -0.22, 1.54         | 3.44                    | 1.33, 8.88          | 1.90                               | 0.55, 3.25          | 3.90                    | 2.24, 6.80          |
| <b>Cannabis use disorder</b>                         | 2.33                               | 0.19, 4.47          | 9.82                    | 4.20, 22.96         | 2.75                               | 1.04, 4.45          | 5.25                    | 3.06, 9.00          |
| <b>Proxy DSM-5 cannabis use disorder<sup>c</sup></b> | 2.59                               | 0.38, 4.80          | 10.85                   | 4.88, 24.12         | 2.70                               | 1.01, 4.39          | 5.18                    | 3.02, 8.89          |

Note: nonmedical cannabis use: without a prescription or other than prescribed, e.g., to get high.

<sup>a</sup> Effects estimated on the additive scale: **prevalence difference** indicates the prevalence difference of psychotic disorders between those with the cannabis predictor and those without cannabis use in 2001-2002 and 2012-2103. These effects are significant when the 95% confidence interval (CI) does not include 0.

<sup>b</sup> Effects estimated on the multiplicative scale: **odds ratio** indicates the ratio of the odds of psychotic disorders between those with and without the cannabis predictor in 2001-2002 and 2012-2103. These effects are significant when the 95% CI does not include 1.

<sup>c</sup> Includes six DSM-IV cannabis use disorder criteria plus proxy for cannabis withdrawal syndrome (three or more of five symptoms: nervousness/anxiety; sleep disturbances; restlessness; depressed mood; and any physical symptoms: sweating/fast heartbeat; fever; shaking; nausea, vomiting, stomach pain; or headache), or using cannabis to avoid withdrawal symptoms.

<sup>c</sup> Effects estimated on the multiplicative scale: **odds ratio** indicates the ratio of the odds (likelihood) of psychotic disorders between those with and without the cannabis predictor in 2001-2002 and 2012-2103. These effects are significant when the 95% CI does not include 1.

**TABLE S3. Sensitivity analysis: Across-survey associations of past-year cannabis indicators with self-reported psychotic disorders, adjusted for state medical cannabis law status**

| Cannabis Indicator                                   | Difference in Prevalence Differences (PD) 2012-2013 vs. 2001-2002 <sup>a</sup> |             | Ratio of Odds Ratios (OR) 2012-2013 vs. 2001-2002 <sup>b</sup> |            |
|------------------------------------------------------|--------------------------------------------------------------------------------|-------------|----------------------------------------------------------------|------------|
|                                                      | Difference in PDs                                                              | 95% CI      | Ratio of ORs                                                   | 95% CI     |
| <b>Any cannabis use</b>                              | -0.17                                                                          | -1.29, 0.95 | 0.46                                                           | 0.23, 0.91 |
| <b>Frequent cannabis use</b>                         | 1.41                                                                           | -0.09, 2.85 | 1.12                                                           | 0.43, 2.92 |
| <b>Daily/near-daily cannabis use</b>                 | 1.24                                                                           | -0.35, 2.83 | 1.13                                                           | 0.38, 3.35 |
| <b>Cannabis use disorder</b>                         | 0.42                                                                           | -2.21, 3.05 | 0.53                                                           | 0.20, 1.40 |
| <b>Proxy DSM-5 cannabis use disorder<sup>c</sup></b> | 0.11                                                                           | -2.56, 2.78 | 0.48                                                           | 0.19, 1.99 |

Note: nonmedical cannabis use: without a prescription or other than prescribed, e.g., to get high.

<sup>a</sup> Effects estimated on the additive scale: prevalence difference indicates the prevalence difference of psychotic disorders between those with and without the cannabis predictor in 2001-2002 and 2012-2013, while **difference in prevalence differences** indicates the difference between those differences. These effects are significant when the 95% confidence interval (CI) does not include 0.

<sup>b</sup> Effects estimated on the multiplicative scale: odds ratio indicates the ratio of the odds (likelihood) of psychotic disorders between those with and without the cannabis predictor in 2001-2002 and 2012-2013, while **ratio of odds ratios** indicates the ratio between those ratios. These effects are significant when the 95% CI does not include 1.

<sup>c</sup> Includes six DSM-IV cannabis use disorder criteria plus proxy for cannabis withdrawal syndrome (three or more of five symptoms: nervousness/anxiety; sleep disturbances; restlessness; depressed mood; and any physical symptoms: sweating/fast heartbeat; fever; shaking; nausea, vomiting, stomach pain; or headache), or using cannabis to avoid withdrawal symptoms.
